# Supplementary material for: The impact of exercise on gene regulation in association with complex trait genetics
Source: PubMed Central journal article supplement (PMC11063075; doi:10.1038/s41467-024-45966-w), 2024-05-01
Supplement: 41467_2024_45966_MOESM3_ESM.pdf [file 41467_2024_45966_MOESM3_ESM.pdf]

# The impact of exercise on gene regulation in association with complex trait genetics

Nikolai G. Vetr<sup>1,\*</sup>, Nicole R. Gay<sup>1</sup>, MoTrPAC Study Group, and Stephen B. Montgomery<sup>1,†</sup>

<sup>1</sup>*Stanford University, Stanford, CA, USA;*

*\*E-mail: [nikgvetr@stanford.edu](mailto:nikgvetr@stanford.edu)*

*†E-mail: [smontgom@stanford.edu](mailto:smontgom@stanford.edu)*



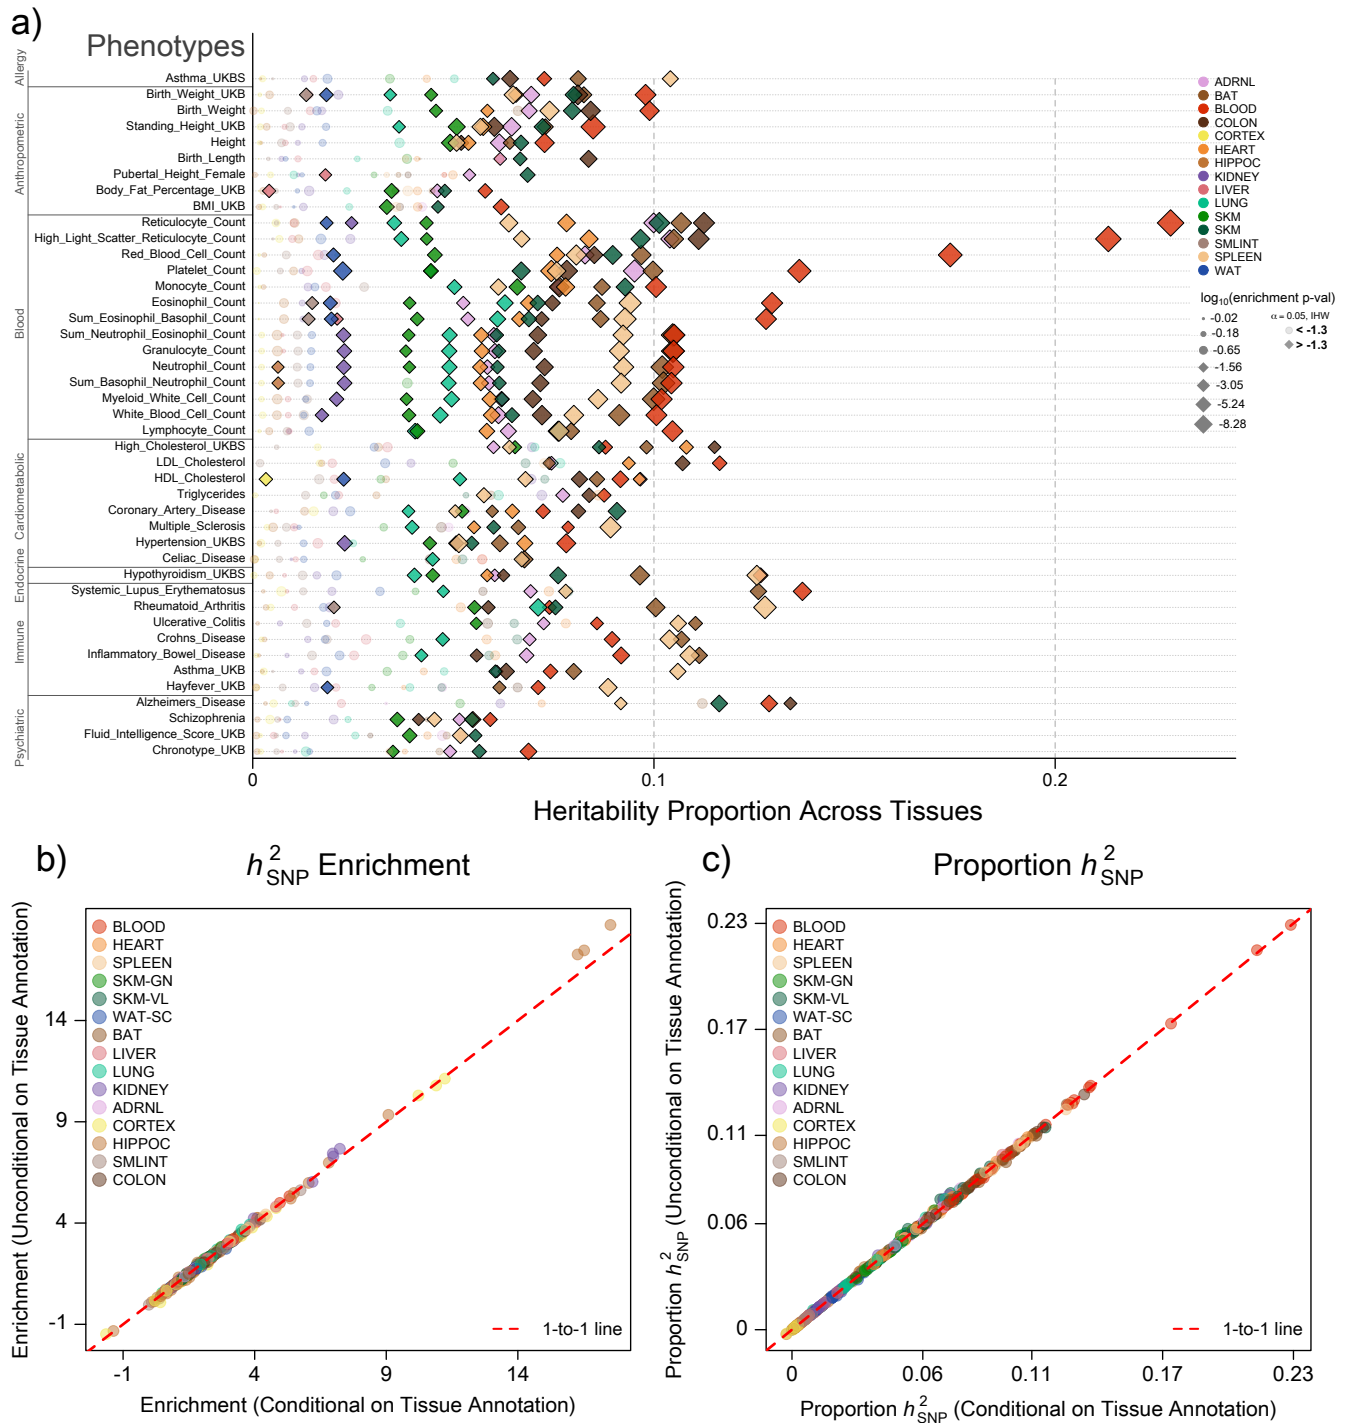

**Supplementary Figure 2: Genetic variation near exercise-responsive genes captures a substantial fraction of trait heritability and is independent across tissues.** Here, we visualize additional output from LDSC to accompany Fig. 3. In a), we show the proportion of total  $h^2_{\text{SNP}}$  that enrichments in Fig. 3 correspond to, marking tissues in which that total proportion was distinguishable from 0 at IHW  $\alpha < 0.05$  (one-sided). In b-c), we show a scatterplot of estimated enrichments and heritability proportions (unfiltered by significance) from two parallel analyses. The horizontal axis represents estimates that are conditional on an annotation that includes all other tissue-specific annotations and a baseline annotation of 53 functional categories. The vertical axis represents estimates conditional only on the baseline annotation. Source data for this figure are provided as a Source Data file.

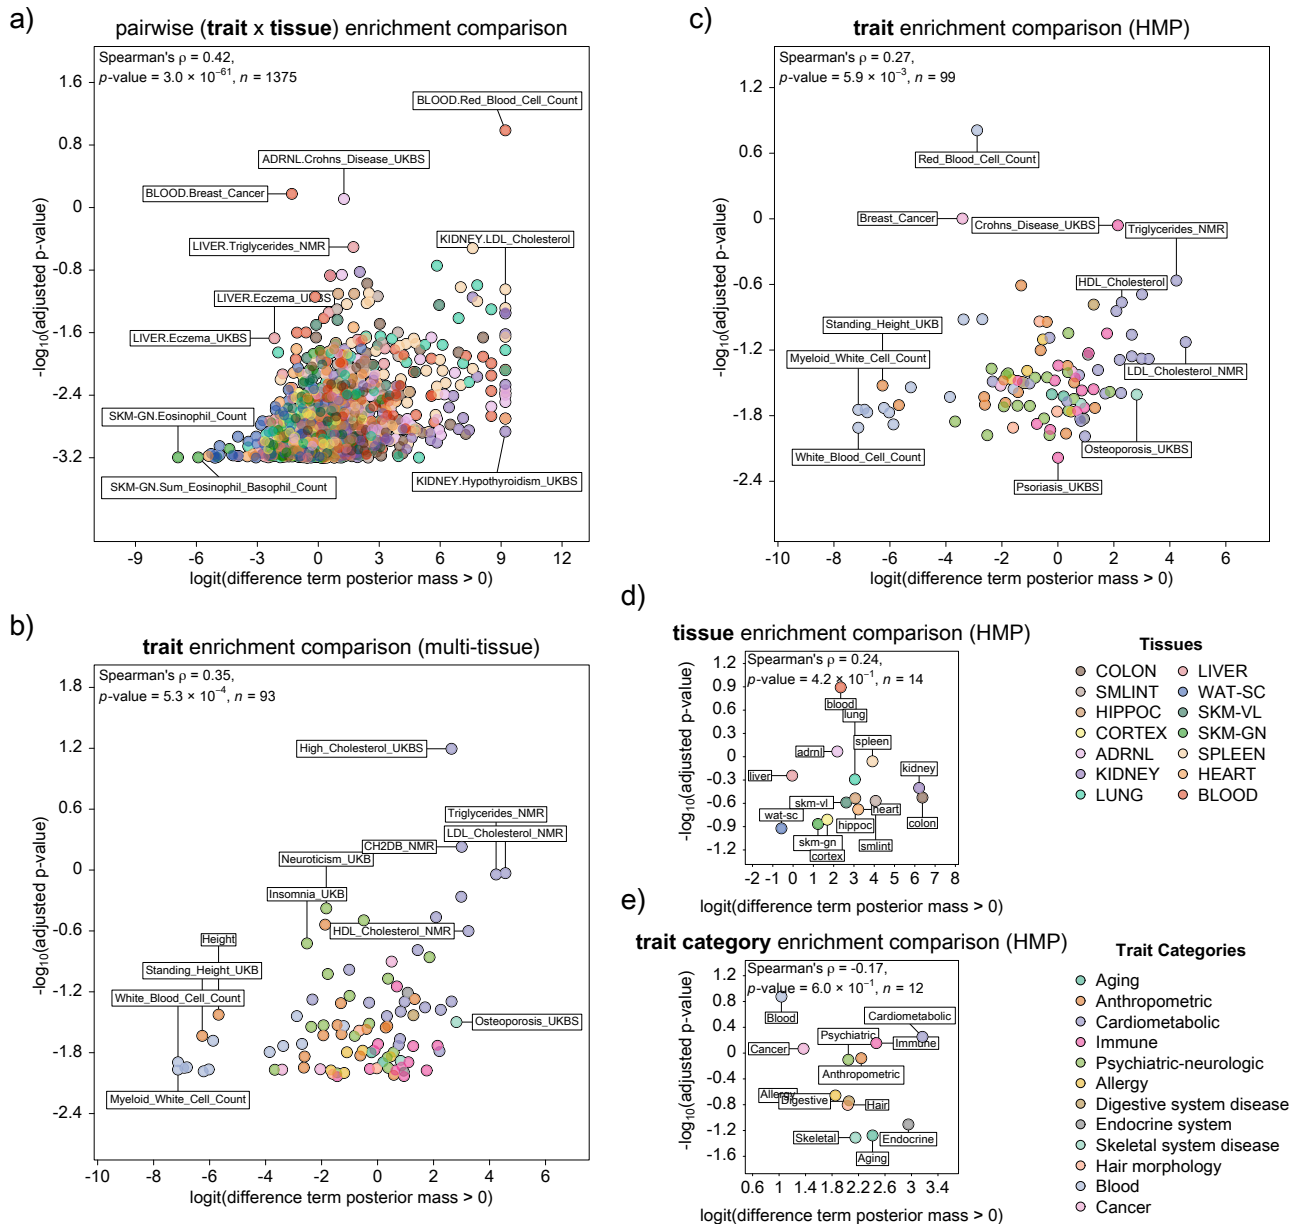

**Supplementary Figure 3: Bayesian and frequentist methods broadly agree in evaluating DEG enrichment across PrediXcan output.** Here, we compare enrichment results between posterior summaries from our multilevel enrichment model (horizontal axis, Fig. 5) and frequentist Gene Set Enrichment Analysis (GSEA). In a), we plot  $-\log_{10}$ (Bonferroni-adjusted p-values) from GSEA of Differentially Expressed Genes (DEGs) in the ranked list of unadjusted  $-\log_{10}$ (p-values) from PrediXcan for each trait  $\times$  tissue pair. In b), we aggregate across tissues by taking only genes that are differentially expressed in three or more tissues and performing GSEA across harmonic mean p-values across the 15 matched tissues from the PrediXcan output. In c-d), we aggregate output from a) by taking harmonic mean p-values (HMP) across traits and tissues, respectively, and computing  $-\log_{10}$ (FWER-adjusted p-values) for plotting. In e), we take the harmonic mean of unadjusted p-values from c) across trait categories and apply the same transformation as before. Spearman's  $\rho$ s are given with nominal p-values (two-sided) in the upper left corners of each plot, with sample sizes of 1,375, 93, 99, 14, and 12 for a-e, respectively. Source data for this figure are provided as a Source Data file.

## SUPPLEMENTARY TABLES

**Supplementary Table 1: General Notation for Acronyms and Abbreviations:** A table compiling all acronyms and abbreviations used in this manuscript.

| Symbol             | Interpretation                                                         |
|--------------------|------------------------------------------------------------------------|
| MoTrPAC            | Molecular Transducers of Physical Activity Consortium                  |
| EET                | Endurance Exercise Training                                            |
| DE                 | Differential Expression                                                |
| DEG                | Differentially Expressed Gene                                          |
| F344               | Fischer 344 Inbred Rats                                                |
| GTE <sub>x</sub>   | Genotype-Tissue Expression project                                     |
| GWAS               | Genome-Wide Association Study                                          |
| GCTA               | Genome-wide Complex Trait Analysis                                     |
| TWAS               | Transcriptome-Wide Association Study                                   |
| LDSC               | Linkage Disequilibrium Score Regression                                |
| SNP                | Single Nucleotide Polymorphism                                         |
| MESC               | Mediated Expression Score Regression                                   |
| eQTL               | Expression Quantitative Trait Loci                                     |
| $h^2_{\text{SNP}}$ | narrow-sense heritability captured by variation at SNPs                |
| 8w_F1_M1           | upregulated DEGs in both males and females after 8 weeks of training   |
| 8w_F-1_M-1         | downregulated DEGs in both males and females after 8 weeks of training |
| IHW                | Independent Hypothesis Weighting                                       |
| BF%                | Body Fat Percentage                                                    |
| ADRNL              | Adrenals                                                               |
| BAT                | Brown Adipose                                                          |
| COLON              | Colon                                                                  |
| CORTEX             | Cortex                                                                 |
| SKM-GN             | Gastrocnemius                                                          |
| HEART              | Heart                                                                  |
| HIPPOC             | Hippocampus                                                            |
| HYPOTH             | Hypothalamus                                                           |
| KIDNEY             | Kidney                                                                 |
| LIVER              | Liver                                                                  |
| LUNG               | Lung                                                                   |
| BLOOD              | Blood RNA                                                              |
| SMLINT             | Small Intestine                                                        |
| SPLEEN             | Spleen                                                                 |
| SKM-VL             | Vastus Lateralis                                                       |
| WAT-SC             | White Adipose                                                          |

**Supplementary Table 2: Intersect Enrichment Model Key:** A table compiling notation used in our Intersect Enrichment model.

| Symbol                 | Support                   | Dimension          | Interpretation                                                                                         |
|------------------------|---------------------------|--------------------|--------------------------------------------------------------------------------------------------------|
| $i$                    | $\{1, 2, \dots, 15\}$     | 1485               | tissue index                                                                                           |
| $j$                    | $\{1, 2, \dots, 99\}$     | 1485               | trait index                                                                                            |
| $k$                    | $\{1, 2, \dots, 12\}$     | 1485               | trait category index                                                                                   |
| $n_{ij}^{\text{DEG}}$  | $\mathbb{N}^0$            | 1485               | observed # of Differentially Expressed Genes (DEG) for tissue $i$ and trait $j$                        |
| $n_{ij}^{-\text{DEG}}$ | $\mathbb{N}^0$            | 1485               | observed # of non-DEGs for tissue $i$ and trait $j$                                                    |
| $y_{ij}$               | $\{1, 2, \dots, n_{ij}\}$ | 1485               | observed # of PrediXcan hits for tissue $i$ and trait $j$                                              |
| $f$                    |                           |                    | $f : \mathbb{R} \rightarrow (0, 1)$ , logit function (maps log-odds to probabilities)                  |
| $\pi_{ij}$             | $\mathbb{R}$              | 1485               | mean log-odds of observing a PrediXcan hit for tissue $i$ and trait $j$                                |
| $\alpha$               | $\mathbb{R}$              | 1                  | average difference in log-odds between DEGs and non-DEGs                                               |
| $\beta_i$              | $\mathbb{R}$              | 15                 | relative deviation to difference in log-odds between DEGs and non-DEGs for tissue $i$                  |
| $\gamma_j$             | $\mathbb{R}$              | 99                 | relative deviation to difference in log-odds between DEGs and non-DEGs for trait $j$                   |
| $\mu_k$                | $\mathbb{R}$              | 12                 | relative deviation to difference in log-odds between DEGs and non-DEGs for trait category $k$          |
| $\epsilon_{ij}$        | $\mathbb{R}$              | 1485               | relative deviation to difference in log-odds between DEGs and non-DEGs for tissue $i \times$ trait $j$ |
| $\sigma^*$             | $\mathbb{R}_{>0}$         | 1                  | various scale hyperparameters (for normal priors)                                                      |
|                        |                           | $15 \times 15$     |                                                                                                        |
| $\Sigma_*$             |                           | $99 \times 99$     | maximum-likelihood estimated correlation matrix (bivariate probit)                                     |
|                        |                           | $1485 \times 1485$ |                                                                                                        |
| $\lambda_k$            | $\mathbb{R}$              | 12                 | mean log-odds of observing a PrediXcan hit for trait in category $k$                                   |
| $\eta_j$               | $\mathbb{R}$              | 99                 | mean log-odds of observing a PrediXcan hit for trait $j$                                               |

**Supplementary Table 3: Directionality Enrichment Model Key:** A table compiling notation used in our Directionality Enrichment model.

| Symbol        | Support                               | Dimension      | Interpretation                                                                                                      |
|---------------|---------------------------------------|----------------|---------------------------------------------------------------------------------------------------------------------|
| $i$           | $\{1, 2, \dots, 15\}$                 | 1485           | tissue index                                                                                                        |
| $j$           | $\{1, 2, \dots, 99\}$                 | 1485           | trait index                                                                                                         |
| $k$           | $\{1, 2, \dots, 12\}$                 | 1485           | trait category index                                                                                                |
| $n_{i,j}$     | $\mathbb{N}^0$                        | 1485           | observed # of Differentially Expressed Genes (DEG) $\cap$ PrediXcan hits for tissue $i$ and trait $j$               |
| $y_{i,j}$     | $\{1, 2, \dots, n_{i,j}\}$            | 1485           | observed # of positive associations in the set of DEGs $\cap$ PrediXcan hits for tissue $i$ and trait $j$           |
| $f$           |                                       |                | $f : \mathbb{R} \rightarrow (0, 1)$ , logit function (maps log-odds to probabilities)                               |
| $\pi_{i,j}$   | $\mathbb{R}$                          | 1485           | mean log-odds of observing a positive association for tissue $i$ and trait $j$                                      |
| $\vec{\mu}_j$ | $\mathbb{R}$                          | 99             | mean log-odds of observing a positive association for trait $j$                                                     |
| $S$           | $\mathbb{R}_{>0}$                     | $99 \times 99$ | diagonal matrix of standard deviations of trait-wise log-odds enrichments in positive effects                       |
| $R$           | $C(\theta, G, I)   \theta \in [0, 1]$ | $99 \times 99$ | correlation matrix of mean positive association log-odds across traits, where $C$ is the weighted average operation |
| $G$           |                                       | $99 \times 99$ | externally estimated SNP correlation matrix across traits                                                           |
| $I$           |                                       | $99 \times 99$ | $j \times j$ identity matrix                                                                                        |
| $\theta$      | $\in [0, 1]$                          | 1              | weight proportion between $G$ and $I$                                                                               |
| $\delta$      | $\mathbb{R}_{>0}$                     | 1              | geometric average standard deviation of trait-wise enrichment in positive effects                                   |
| $\gamma_k$    | $\mathbb{R}$                          | 12             | multiplicative category deviation to $\delta$ for trait category $k$                                                |
| $\rho$        | $\mathbb{R}_{>0}$                     | 1              | geometric average standard deviation of tissue-wise enrichment in positive effects for a given trait                |
| $\lambda_j$   | $\mathbb{R}_{>0}$                     | 99             | multiplicative category deviation to $\rho$ for trait $j$                                                           |

## SUPPLEMENTARY METHODS

*Empirical Bayesian Estimation of Expression Variance*

Full Bayesian analysis of GTEx expression variance was found to be computationally intractable, so we adopted an empirical Bayesian approximation instead. The specific steps of that analysis were:

1. Modify the *gtex-pipeline* using the GTEx v8 data release for each gene in each relevant tissue to use a  $\log_2(x+1)$  transformation instead of an inverse normal transformation.
2. Fit a linear model (via OLS) to these values independently for each gene and tissue using GTEx v8 covariates. “Regress” or “residualize” out the estimated effects of these covariates by subtracting from each individual the values corresponding to their covariates.
3. For each gene in each tissue, compute a sample variance (implicitly within-sex, as sex was a covariate in the above step).
4. For each tissue, fit an inverse gamma distribution across gene variances. Using these fitted values, update this “empirical” prior using each sample variance and sample size, separately for each sex. Fitting the inverse-gamma separately for each sex would have yielded fully sex-specific estimates, but we estimated pooled hyperparameters and unpooled posteriors to approximate regularization of each sex-specific variance towards a pooled mean variance.
5. Compute the expectation of these sex-, tissue-, and gene-specific posterior distributions as an estimate of total phenotypic variance stratified along the above axes.
